# Supplementary material for: Biochemical characterization of a novel ulvan lyase from Pseudoalteromonas sp. strain PLSV
Source: PubMed Central journal article supplement — RSC Adv. 2018 Jan 10;8(5):2610–5. doi: 10.1039/c7ra12294b (PMC9077492; doi:10.1039/c7ra12294b), 2018-01-10
Supplement: RA-008-C7RA12294B-s001.pdf [file RA-008-C7RA12294B-s001.pdf]

## Supporting Information

for:

Biochemical characterization of a novel ulvan lyase from *Pseudoalteromonas* sp.

strain PLSV

**Hui-Min Qin<sup>a,b,c</sup>, Panpan Xu<sup>c</sup>, Qianqian Guo<sup>c</sup>, Xiaotao Cheng<sup>c</sup>, Dengke Gao<sup>c</sup>,**

**Dengyue Sun<sup>c</sup>, Zhangliang Zhu<sup>c</sup>, Fuping Lu<sup>a,b,c,d\*</sup>**

<sup>a</sup> Key Laboratory of Industrial Fermentation Microbiology, Ministry of Education;

<sup>b</sup> Tianjin Key Laboratory of Industrial Microbiology;

<sup>c</sup> College of Biotechnology, Tianjin University of Science and Technology;

<sup>d</sup> National Engineering Laboratory for Industrial Enzymes, Tianjin 300457, People's  
Republic of China

\*Corresponding authors: F. Lu;

Tel: +86-22-60601958. Fax: +86-22-60602298

E-mail: lfp@tust.edu.cn

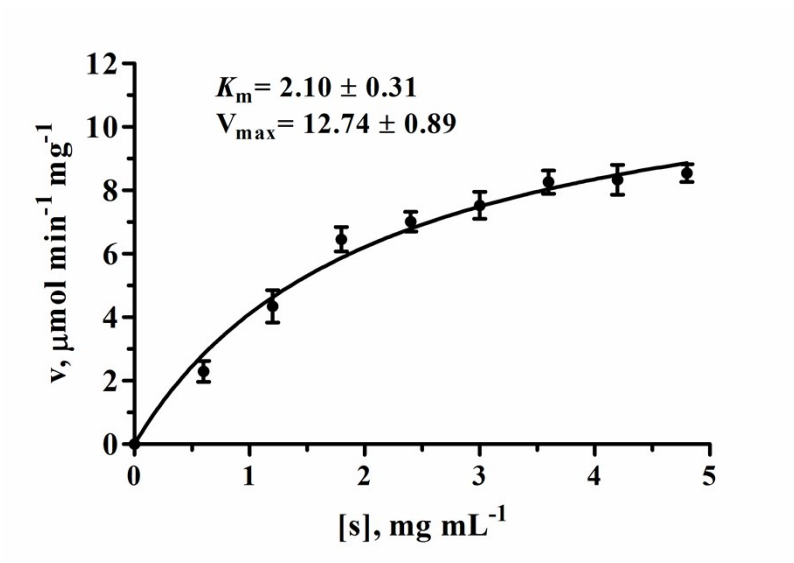

**Fig. S1** Michaelis - Menten plots of PsPL

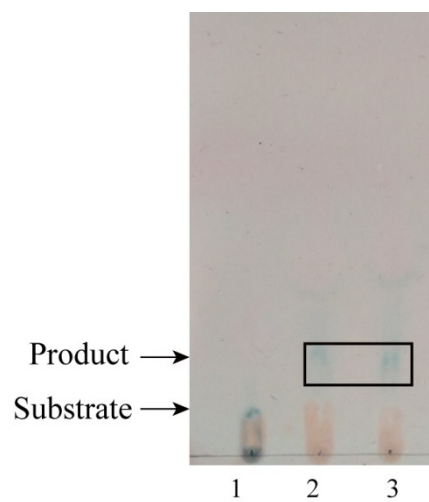

**Fig. S2** Product analysis by TLC. Lane 1: substrate; Lane 2, 3: the reaction products.

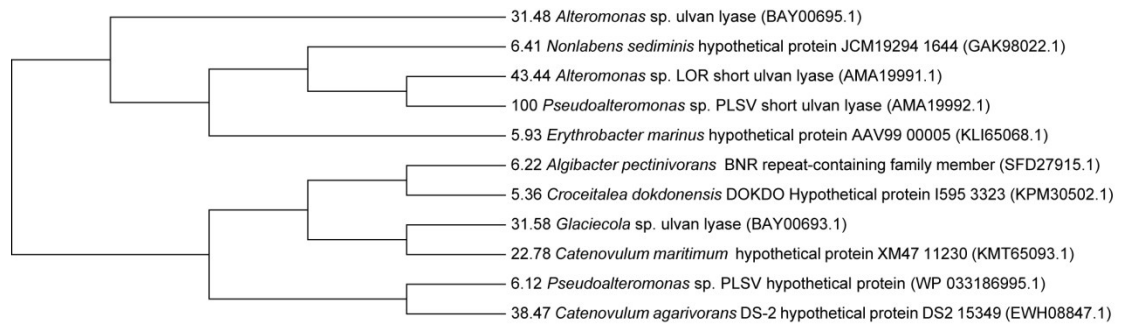

**Fig. S3** Phylogenetic tree analysis of PsPL. The enzymes with different amino acid sequences in the CAZy Database PL24 and PL25 families were searched and their sequences were compared to PsPL.
